# Supplementary material
Source: publisher figshare collection journal article supplement (https://frontiersin.figshare.com/ndownloader/files/26819303)
Supplement: Supplementary file [file 26819303]

## *Supplementary Material*

### **Antagonistic activity of *Trichoderma* spp. against *Fusarium oxysporum* in rhizosphere of *Radix pseudostellariae*, trigger the expression of host defense genes and improve its growth under long term monoculture system**

Jun Chen<sup>1,2,3</sup>, Liuting Zhou<sup>1,2</sup>, Israr Ud Din<sup>5</sup>, Yasir Arafat<sup>1,3,4</sup>, Qian Li<sup>1,2,3</sup>, Juanying Wang<sup>1,2</sup>, Tingting Wu<sup>1,2,7</sup>, Linkun Wu<sup>1,2,3</sup>, Hongmiao Wu<sup>1,2,3</sup>, Xianjin Qin<sup>2,3</sup>, Ganga Raj Pokhrel<sup>6</sup>, Sheng Lin<sup>1,2\*</sup>, and Wenxiong Lin<sup>1,2,3\*</sup>

<sup>1</sup>College of Life Sciences, Fujian Agriculture and Forestry University, Fuzhou 350002, Fujian, P. R. China.

<sup>2</sup>Fujian Provincial Key Laboratory of Agroecological Processing and Safety Monitoring, Fujian Agriculture and Forestry University, Fuzhou 350002, Fujian, P. R. China.

<sup>3</sup>Key laboratory of crop genetic breeding and comprehensive utilization of the ministry of education, Fujian Agriculture and Forestry University, Fuzhou 350002, Fujian, P. R. China.

<sup>4</sup>Key Laboratory of Crop Ecology and Molecular Physiology, Fujian Agriculture and Forestry University, Fuzhou 350002, Fujian, P. R. China.

<sup>5</sup>Institute of Biotechnology and Genetic Engineering (IBGE), the University of Agriculture Peshawar, Peshawar 25130, Pakistan.

<sup>6</sup>Tribhuvan University, Birendra Multiple Campus, Department of Chemistry, Chitwan, Nepal.

<sup>7</sup>Fujian Provincial Academy of Environmental Science, Fujian Provincial Technology Center of Emission Storage and Management, Fujian, P. R. China

\*Correspondence:

Wenxiong Lin and Sheng Lin

Fujian Agriculture and Forestry University,

Email: lwx@fafu.edu.cn, linsh@fafu.edu.cn



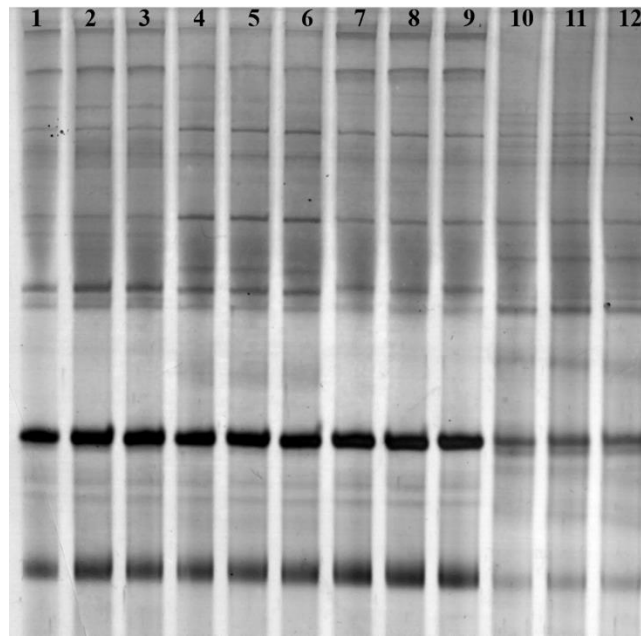

**Supplementary Figure S2.** *Trichoderma* community structure based on specific ITS denaturing gradient gel electrophoresis (DGGE). Lanes 1, 2 and 3 represent with no plantation of *R. pseudostellariae* (CK); lanes 4, 5 and 6 represent plot *R. pseudostellariae* cultivated in fresh soil (FP); lanes 7, 8 and 9 represent plot with *R. pseudostellariae*, monocultured for two consecutive years (SP); lanes 10, 11 and 12 represent plot with cultivation of *R. pseudostellariae* for three consecutive years (TP).

**Supplementary Table S1** Taxon-specific primer sets and their thermal cycling conditions for quantitative PCR.

| Primer                    | Sequence (5´-3´)           | Thermal conditions                                                                       | Reference                                   |
|---------------------------|----------------------------|------------------------------------------------------------------------------------------|---------------------------------------------|
| <i>Fusarium oxysporum</i> |                            |                                                                                          |                                             |
| ITS1-F                    | CTTGGTCATTTAGAGGAAGTAA     | 95°C for 10min; 95°C for 50 s, 60.4°C for 1 min , 72°C for 1 min, 40 cycles              | Lievens et al., 2005                        |
| AFP308R                   | CGAATTAACGCGAGTCCCAA       |                                                                                          |                                             |
| <i>Trichoderma</i>        |                            |                                                                                          |                                             |
| spp.                      |                            |                                                                                          |                                             |
| DG                        | GGTCTGAGAGGATGATCAGT       | 95°C for 10min; 95°C for 1 min, 55°C for 1 min , 72°C for 1 min, 40 cycles               | Teng et al., 2015                           |
| DT                        | TTAGCTCCACCTCGCGGC         |                                                                                          |                                             |
| <i>tef1</i>               |                            |                                                                                          |                                             |
| EF1                       | ATGGGTAAGGARGACAAGAC       | 95°C for 3 min; 95°C for 30 s, 53°C for 30 s, 72°C for 1 min, 35 cycles; 72°C for 10 min | O'Donnell et al., 1998                      |
| EF2                       | GGARGTACCAGTSATCATGTT      |                                                                                          |                                             |
| <b>ITS</b>                |                            |                                                                                          |                                             |
| ITS1F                     | CTTGGTCATTTAGAGGAAGTAA     | 95°C for 3 min; 95°C for 30 s, 55°C for 30 s, 72°C for 1 min, 35 cycles; 72°C for 10 min | Gardes and Bruns, 1993; White et al., 1990; |
| ITS4                      | TCC TCC GCT TAT TGA TAT GC |                                                                                          |                                             |
| <i>rpb2</i>               |                            |                                                                                          |                                             |
| fRPB2-5f                  | GAYGAYMGWGATCAYTTYGG       | 95°C for 3 min; 95°C for 30 s, 58°C for 30 s, 72°C for 1 min, 35 cycles; 72°C for 10 min | Liu et al., 1999                            |
| fRPB2-7cr                 | CCCATRGCTTGTYRCCCAT        |                                                                                          |                                             |

## References

- Gardes, M., and Bruns, T.D. (1993). ITS primers with enhanced specificity for basidiomycetes-application to the identification of mycorrhizae and rusts. *Mol. Ecol.* 2: 113-118. DOI: 10.1111/j.1365-294x.1993.tb00005.x
- Lievens, B., Brouwer, M., Vanachter, A. C., L  vesque, C. A., Cammue, B. P., and Thomma, B. P. (2005). Quantitative assessment of phytopathogenic fungi in various substrates using a DNA macroarray. *Environ. Microbiol.* 7: 1698-1710. DOI: 10.1111/j.1462-2920.2005.00816.x
- Liu, Y. J., Whelen, S., Hall, B. D. (1999). Phylogenetic relationships among ascomycetes: evidence from an RNA polymerase II subunit. *Mol. Biol. Evol.* 12: 1799. DOI: 10.1093/oxfordjournals.molbev.a026092
- O'Donnell, K., Cigelnik, E., Nirenberg, H. I. (1998). Molecular systematics and phylogeography of the *Gibberella fujikuroi* species complex. *Mycologia.* 90(3): 465-493. DOI: 10.2307/3761407
- Teng, Y., Luo, Y., Ma, W., Zhu, L., Ren, W., Luo, Y., et al. (2015). *Trichoderma reesei* FS10-C enhances phytoremediation of Cd-contaminated soil by *Sedum plumbizincicola* and associated soil microbial activities. *Front Plant Sci.* 6: 438. DOI: 10.3389/fpls.2015.00438

White, T.J., Bruns, T., Lee, S., and Taylor, J. (1990). Amplification and direct sequencing of fungal ribosomal RNA genes for phylogenetics. PCR protocols: a guide to methods and applications. 1, 315-322.

**Supplementary Table S2** Primers designed for Real-Time PCR analysis.

| Gene            | Function name                       | Primer  | Primer sequence        | References          |
|-----------------|-------------------------------------|---------|------------------------|---------------------|
| <i>actin</i>    | actin                               | Actin-F | CTGTATTTACGCTCAGGTGG   | Qin et al.,<br>2017 |
|                 |                                     | Actin-R | CATTGTGCTCAGTGGTGG     |                     |
| <i>PAL1</i>     | phenylalanine ammonia-lyase 1       | PAL1-F  | CAACCACTCATCAGACCCAC   | This study          |
|                 |                                     | PAL1-R  | GAGCCACTGTCAATGTTTCC   |                     |
| <i>PAL3</i>     | phenylalanine ammonia-lyase 3       | PAL3-F  | ATGTTGGAAGCCATCACC     | This study          |
|                 |                                     | PAL3-R  | AGCCCAGCAATGTAGGAG     |                     |
| <i>CH5</i>      | chitinase 5-like                    | CH5-F   | CCCAATCCAACTAACCTG     | This study          |
|                 |                                     | CH5-R   | ACTTGACACGGCTCCTAA     |                     |
| <i>CH4</i>      | Chitinase class IV                  | CH4-F   | CTCTAGTTACCCTAGTTTCG   | This study          |
|                 |                                     | CH4-R   | TCAGTAGCCAAGATTTC      |                     |
| <i>CH1</i>      | Chitinase 1                         | CH1-F   | TTCTTATGCTCCTAATCACCC  | This study          |
|                 |                                     | CH1-R   | CGAGTAGTCCCACAGTATCCA  |                     |
| <i>PR10</i>     | pathogenesis-related protein 10     | PR10-F  | AGGTGATGTACTCCGAGGCG   | This study          |
|                 |                                     | PR10-R  | GCAACGAGGTATTCAGAAGCAG |                     |
| <i>PRSTH-21</i> | pathogenesis-related protein STH-21 | PRS-F   | GTGGAGTTACCCCAGCAAG    | This study          |
|                 |                                     | PRS-R   | CAGAGTCAACGTCACCCTCA   |                     |
| <i>PR1a</i>     | pathogenesis-related protein 1a     | PR1a-F  | AACAATACGCAAACGAAAG    | This study          |
|                 |                                     | PR1a-R  | AACCAAGACGAACCGAGT     |                     |
| <i>PR4</i>      | pathogenesis-related protein PR-4   | PR4-F   | TATGCCTAGTTGTTCGGTGGT  | This study          |
|                 |                                     | PR4-R   | GTTGTTTGTGCTCCTGTTCC   |                     |
